# Supplementary material for: The Potential Role of Fecal Microbiota Transplant in the Reversal or Stabilization of Multiple Sclerosis Symptoms: A Literature Review on Efficacy and Safety
Source: MDPI journal article supplement (doi:10.3390/microorganisms11122840), 2023-11-22
Supplement: s1 [file s1]

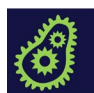

# The Potential Role of Fecal Microbiota Transplant in the Reversal or Stabilization of Multiple Sclerosis Symptoms: A Literature Review on Efficacy and Safety

Tooba Laeeq <sup>1,\*</sup>, Tahne Vongsavath <sup>1</sup>, Kyaw Min Tun <sup>1</sup> and Annie S. Hong <sup>2</sup>

<sup>1</sup> Department of Internal Medicine, University of Nevada, Las Vegas, NV 89154, USA

<sup>2</sup> Department of Gastroenterology, University of Nevada, Las Vegas, NV 89154, USA

\* Correspondence: tooba.laeeq@unlv.edu

**Supplemental Table S1.** Search terms utilized in data extraction.

| Search terms utilized in data extraction |                                                                                                                                                                                                                                                                                                                                                                                                                                                                                                                                                                                                                                                                                                                                                                                                                                                                                                                                                                                                                                                                                                                                                                                                                                                                                                                                                                                                                                                                                                                                                                                                                                                                                                                                                                                                                                                                                                                                                                                                                                                                                                                                                                                                                                                                                                                                                                                                                          |
|------------------------------------------|--------------------------------------------------------------------------------------------------------------------------------------------------------------------------------------------------------------------------------------------------------------------------------------------------------------------------------------------------------------------------------------------------------------------------------------------------------------------------------------------------------------------------------------------------------------------------------------------------------------------------------------------------------------------------------------------------------------------------------------------------------------------------------------------------------------------------------------------------------------------------------------------------------------------------------------------------------------------------------------------------------------------------------------------------------------------------------------------------------------------------------------------------------------------------------------------------------------------------------------------------------------------------------------------------------------------------------------------------------------------------------------------------------------------------------------------------------------------------------------------------------------------------------------------------------------------------------------------------------------------------------------------------------------------------------------------------------------------------------------------------------------------------------------------------------------------------------------------------------------------------------------------------------------------------------------------------------------------------------------------------------------------------------------------------------------------------------------------------------------------------------------------------------------------------------------------------------------------------------------------------------------------------------------------------------------------------------------------------------------------------------------------------------------------------|
| 1. Fecal Microbiota transplant           | Fecal Microbiome Transplantation OR Intestinal Microbiota Transfers OR Donor Feces Infusions OR Microbiome Transfer Intestinal OR Transplantations Intestinal Microbiome Transplantations OR Fecal Microbiota OR Intestinal Microbiome OR, Fecal Microbiota Transplantation OR Fecal Microbiota Transfer OR Intestinal Microbiome Transfers OR Microbiome Transplantations OR Fecal Infusion OR Donor Feces Transfer, Intestinal Microbiota OR Microbiota Transfer OR Fecal Transfers OR Intestinal Microbiome Transplants OR Intestinal Microbiota Transplantations OR Fecal Microbiome Transplantation OR Microbiota Transfers OR, Intestinal Microbiome Transplants OR Fecal Microbiota Transplant OR Donor Feces Infusions OR Intestinal Microbiota Transplantations OR Fecal Microbiota Transplantations OR Intestinal Microbiota Transplantation OR Intestinal Microbiome Transplants OR Intestinal Microbiome Transplants OR Intestinal Microbiome Transfer OR Fecal Microbiota Transfer OR Intestinal Microbiota Transplantations OR Intestinal Microbiome Transplantation OR Fecal Microbiota Transplantation OR Intestinal Microbiome Transfer OR, Intestinal Microbiome Transplantations OR Intestinal Microbiota Transplantation OR Fecal Microbiome Transplantations OR Fecal Microbiota Transplants OR Fecal Microbiota Transplant OR Fecal Microbiota Transplantations OR Fecal Microbiota Transfers OR Intestinal Microbiome Transplantation OR Fecal Microbiota Transfers OR Donor Feces Infusion OR Intestinal Microbiota Transfers OR Intestinal Microbiota Transplantations OR Intestinal Microbiome Transfer OR Intestinal Microbiota Transplant OR Intestinal Microbiota Transfer OR Intestinal Microbiome Transplant OR Fecal Microbiota Transplantations OR Intestinal Microbiome Transplantations OR Fecal Microbiome Transplantation OR Intestinal Microbiota Transplants OR Fecal Microbiome Transplantation OR Donor Feces Infusions OR Intestinal Microbiota Transplants OR Intestinal Microbiome Transfers OR, Intestinal Microbiota Transfer OR, Donor Feces Infusion OR Intestinal Microbiota Transplantation OR Intestinal Microbiome Transplant OR Intestinal Microbiota Transplant OR Intestinal Microbiota Transplant OR Fecal Microbiota Transplant OR Fecal Microbiota Transplants OR Fecal Microbiota Transfers OR Fecal Transplant OR Fecal Transplantation OR Fecal Transplants |
|                                          | AND                                                                                                                                                                                                                                                                                                                                                                                                                                                                                                                                                                                                                                                                                                                                                                                                                                                                                                                                                                                                                                                                                                                                                                                                                                                                                                                                                                                                                                                                                                                                                                                                                                                                                                                                                                                                                                                                                                                                                                                                                                                                                                                                                                                                                                                                                                                                                                                                                      |

## 0. Multiple Sclerosis

Multiple Sclerosis, Acute Fulminating OR Sclerosis, Multiple OR Disseminated Sclerosis OR Sclerosis, Disseminated OR MS (Multiple Sclerosis)

**Supplemental Table S2.** Quality assessment scores for case studies.

| Author/Year                     | Study Design                | Tool      | Score    |
|---------------------------------|-----------------------------|-----------|----------|
| Kait 2022                       | Randomized controlled trial | RoB2      |          |
| Engen 2020                      | Case study                  | NIH tool  | 7 (Good) |
| Makkawi 2017                    | Case study                  | NIH scale | 5 (Good) |
| Thomas Brody, 2011              | Case series                 | NIH scale | 7 (Good) |
| Victor Garcia-Rodriguez<br>2020 | Case study                  | NIH scale | 6 (Good) |

**Supplemental Table S3.** Quality assessment in detail for case series and case reports using the NIH scale.

| NIH scale                                 |                                                                                                                          | Engen | Brody | Rodriguez | Makkawi |
|-------------------------------------------|--------------------------------------------------------------------------------------------------------------------------|-------|-------|-----------|---------|
| 1.                                        | Was the study question or objective clearly stated?                                                                      | Yes   | Yes   | Yes       | Yes     |
| 2.                                        | Was the study population clearly and fully described including a case definition?                                        | Yes   | Yes   | No        | Yes     |
| 3.                                        | Were the cases consecutive?                                                                                              | No    | No    | No        | No      |
| 4.                                        | Were the subjects comparable?                                                                                            | No    | Yes   | No        | No      |
| 5.                                        | Were the interventions clearly described?                                                                                | Yes   | Yes   | Yes       | Yes     |
| 6.                                        | Were the outcomes measured clearly defined, valid, reliable, and implemented consistently across all study participants? | Yes   | Yes   | Yes       | Yes     |
| 7.                                        | Was the length of the follow-up adequate?                                                                                | Yes   | Yes   | Yes       | Yes     |
| 8.                                        | Were the statistical methods well described?                                                                             | Yes   | No    | Yes       | No      |
| 9.                                        | Were the results well described?                                                                                         | Yes   | Yes   | Yes       | No      |
| Total number of yes                       |                                                                                                                          | 7     | 7     | 6         | 5       |
| Quality (7–9: Good, 4–6: fair, 1–3: poor) |                                                                                                                          | Good  | Good  | Fair      | Fair    |

**Supplemental Table S4.** Quality assessment for randomized controlled trial.

| Domain                                                         | Predicted direction of bias |
|----------------------------------------------------------------|-----------------------------|
| Risk of bias arising from randomization process                | Low                         |
| Risk of bias due to deviations from the intended interventions | Unclear                     |
| Missing outcome data                                           | Low                         |
| Risk of bias in measurement of outcome                         | Low                         |
| Risk of bias in selection of the reported result               | Low                         |
